# Supplementary material
Source: PubMed Central journal article supplement (PMC5899674)
Supplement: NIHMS943354-supplement-3.pdf [file NIHMS943354-supplement-3.pdf]

## Supplementary Figures

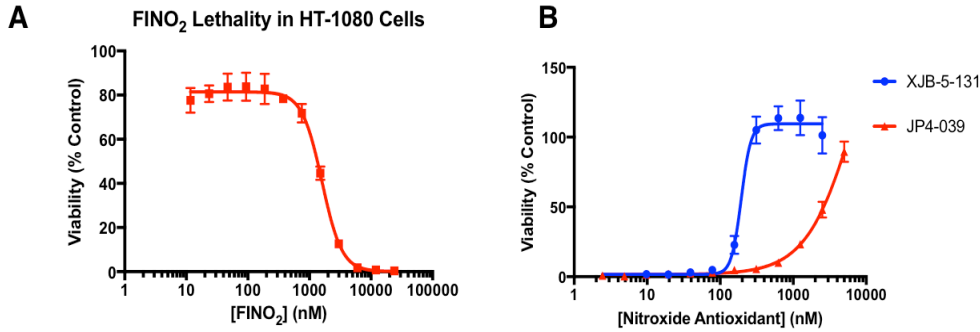

**Supplementary Figure 1.** (A) Dose-dependent lethality of  $\text{FINO}_2$  in HT-1080 cells. Experiments were performed in biological triplicate. (B) Dose-dependent rescue of ferroptosis-suppressing nitroxides on HT-1080 cells treated with  $\text{FINO}_2$  (10  $\mu\text{M}$ ). Viability for (A) and (B) was measured 24 h after compound addition using presto blue. Experiments were performed in biological triplicate. Data are plotted as the mean  $\pm$  s.d..

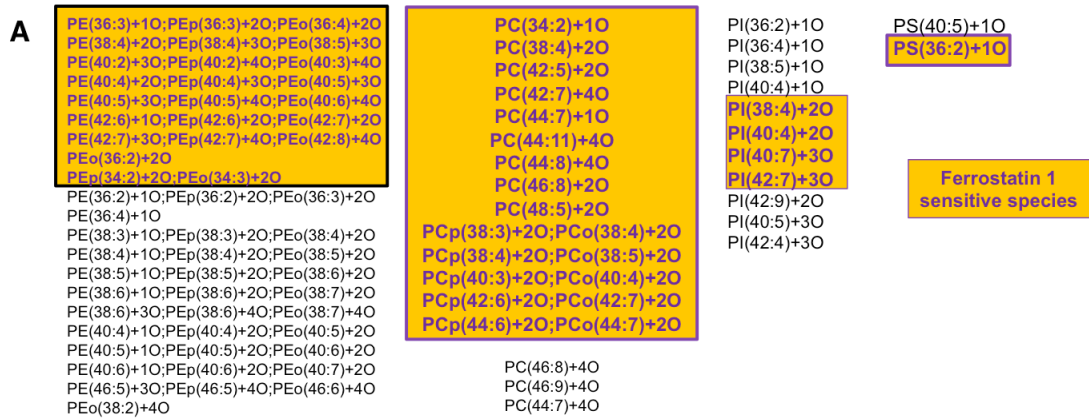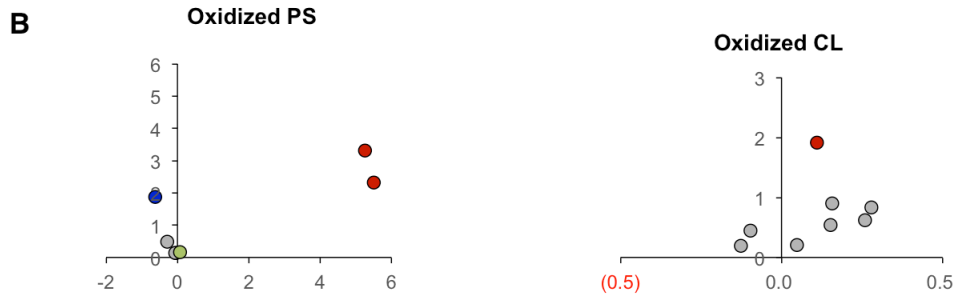

**Supplementary Figure 2.** (A) Lipids oxidized in HT-1080 cells treated with  $\text{FINO}_2$  (10  $\mu\text{M}$ ). Lipids that were not upregulated when co-treated with ferroptosis suppressor ferrostatin (2  $\mu\text{M}$ ) are boxed in orange. PE: Phosphatidylethanolamine, PC: Phosphatidylcholine, PI: Phosphatidylinositol, PS: Phosphatidylserine. (B) Change in oxidized phosphatidylserine (PS) and cardiolipin (CL) following  $\text{FINO}_2$  treatment in HT-1080 cells (10  $\mu\text{M}$ ). Green and gray circles indicate no change, red circles indicate an increase in abundance and blue circles indicate depletion.

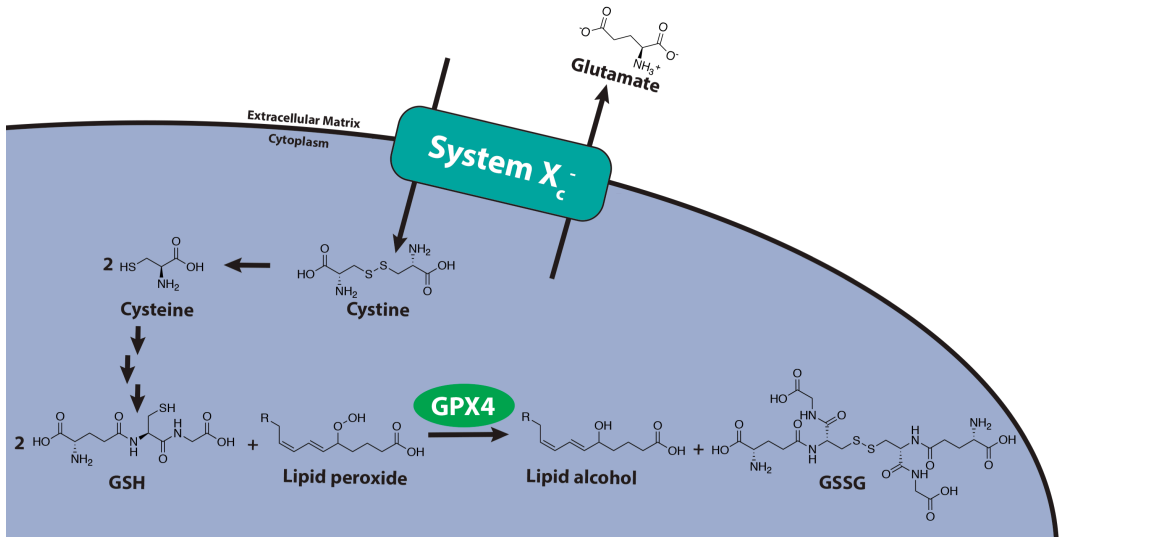

**Supplementary Figure 3.** Cystine import via system x<sub>c</sub><sup>-</sup> provides cysteine required for synthesis of glutathione (GSH), a necessary cofactor for the lipid peroxide-reducing enzyme GPX4.

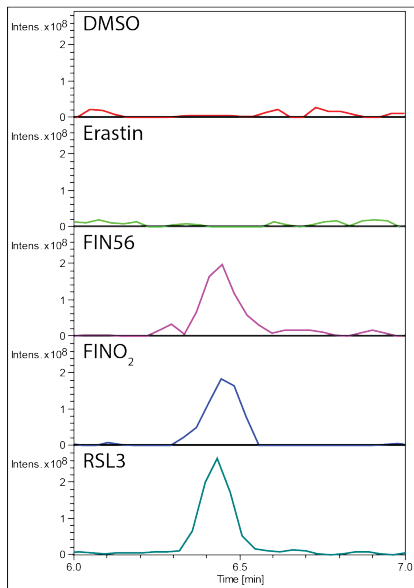

**Supplementary Figure 4.** Effect of ferroptosis inducers on the *in vitro* activity of GPX4 from treated HT-1080 cells. Cells were treated with DMSO, erastin (10 μM), FIN56 (5 μM), or FINO<sub>2</sub> (10 μM) for 6 h or RSL3 (0.5 μM) for 2 h. Cells were lysed and lysates were treated with PCOOH and GSH; after incubation (45 min) mixtures were extracted for lipids and the abundance of PCOOH was measured by LC-MS. Three independent experiments were performed with similar results.

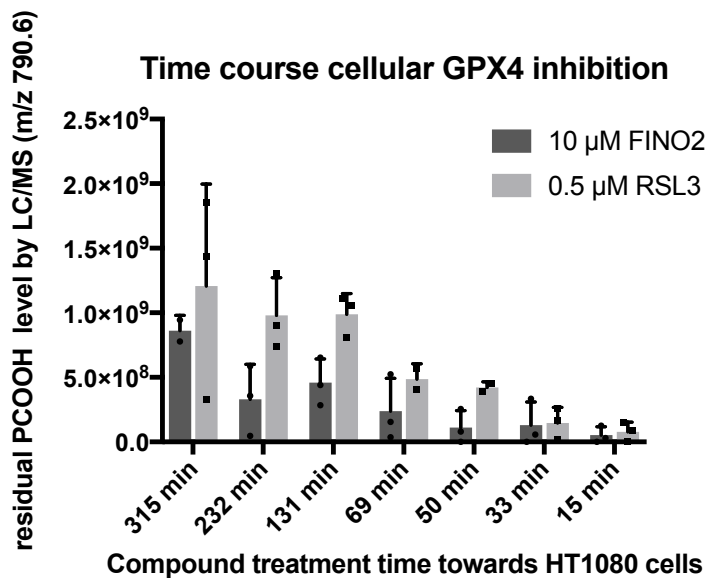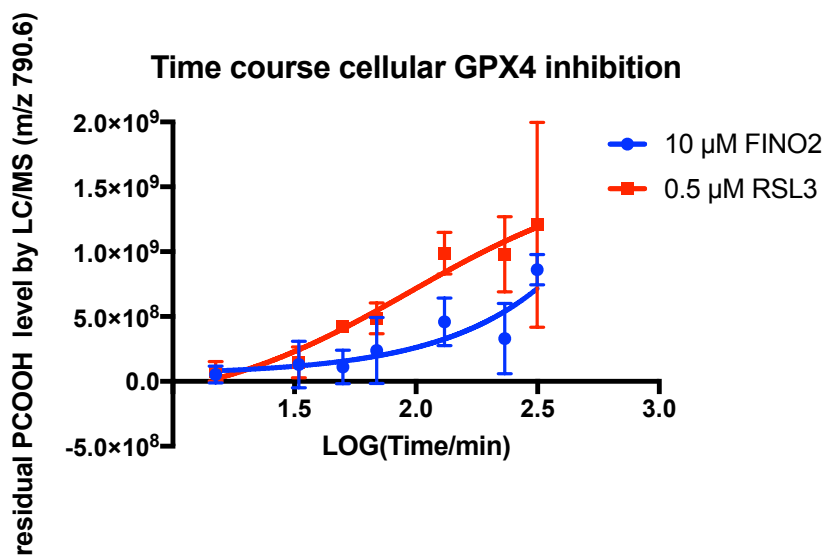

**Supplementary Figure 5.** Time dependent inhibition of GPX4-mediated PCOOH reduction by RSL3 and FINO<sub>2</sub>. Data are plotted as the mean  $\pm$  s.d.. Experiments were performed in triplicate with biologically independent samples.

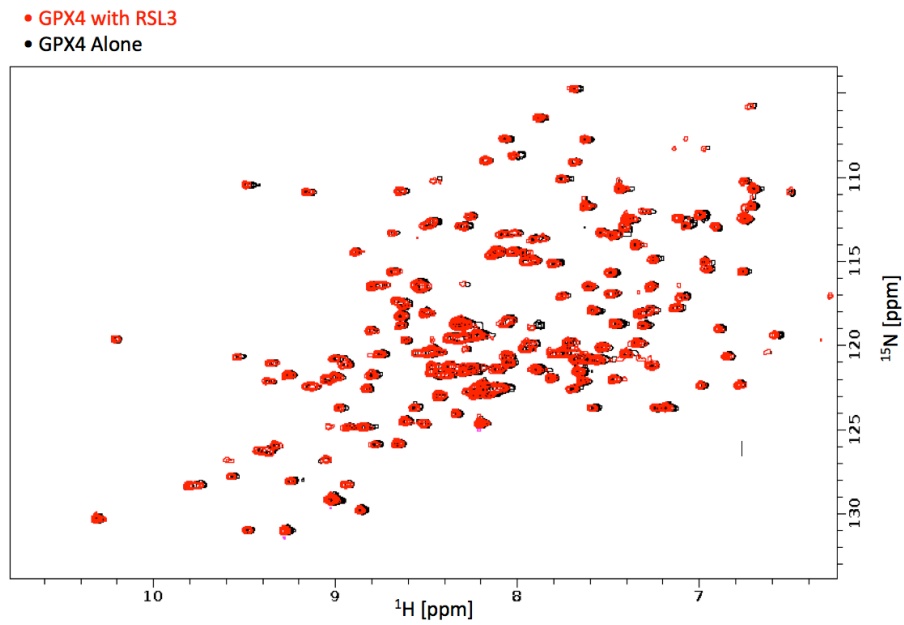

**Supplementary Figure 6.** HSQC NMR of GPX4<sup>U46C</sup> (10  $\mu\text{M}$ ) with RSL3 (100  $\mu\text{M}$ ).

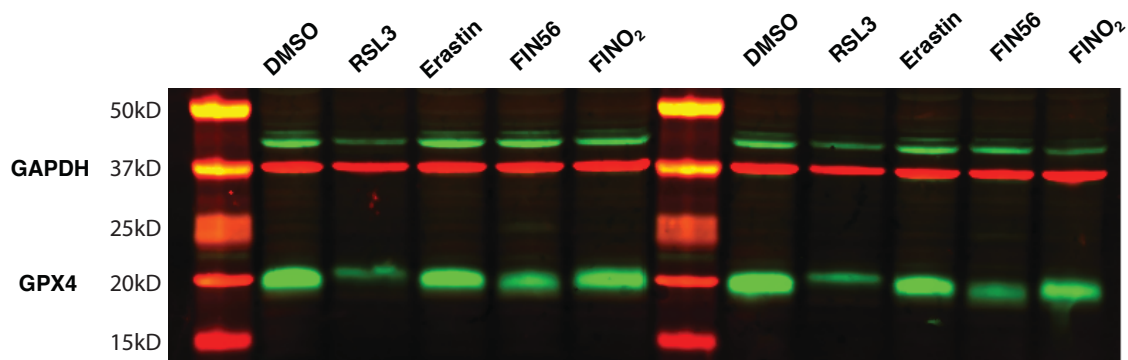

**Supplementary Figure 7.** Representative blot image from figure 3E.

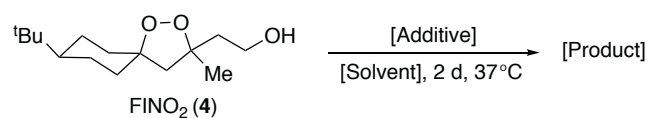

| Entry | [Additive] <sup>a</sup> | [Solvent]                                    | [Product]   |
|-------|-------------------------|----------------------------------------------|-------------|
| 1     | cysteine                | DMSO- <i>d</i> <sub>6</sub>                  | no reaction |
| 2     | GSH                     | DMSO- <i>d</i> <sub>6</sub>                  | no reaction |
| 3     | arachadonic acid        | CD <sub>3</sub> CN                           | no reaction |
| 4     | selenocysteine          | DMSO- <i>d</i> <sub>6</sub>                  | no reaction |
| 5     | ebselen                 | DMSO- <i>d</i> <sub>6</sub>                  | no reaction |
| 6     | Et <sub>3</sub> N       | DMSO- <i>d</i> <sub>6</sub>                  | no reaction |
| 7     | KOH                     | DMSO- <i>d</i> <sub>6</sub>                  | no reaction |
| 8     | DCI, KCl, NaCl          | D <sub>2</sub> O/DMSO- <i>d</i> <sub>6</sub> | no reaction |

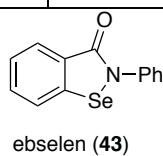

**Supplementary Figure 8.** Stability of FINO<sub>2</sub> under various reactive conditions.

A

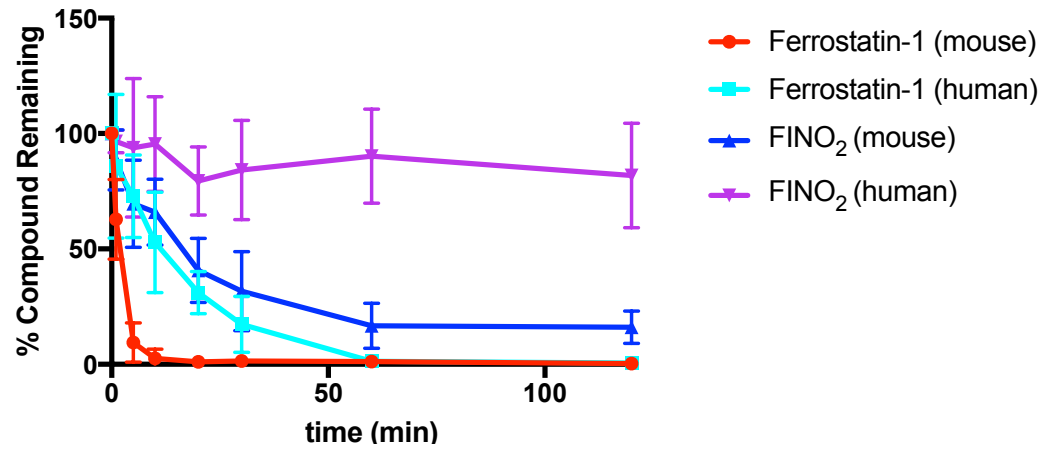

B

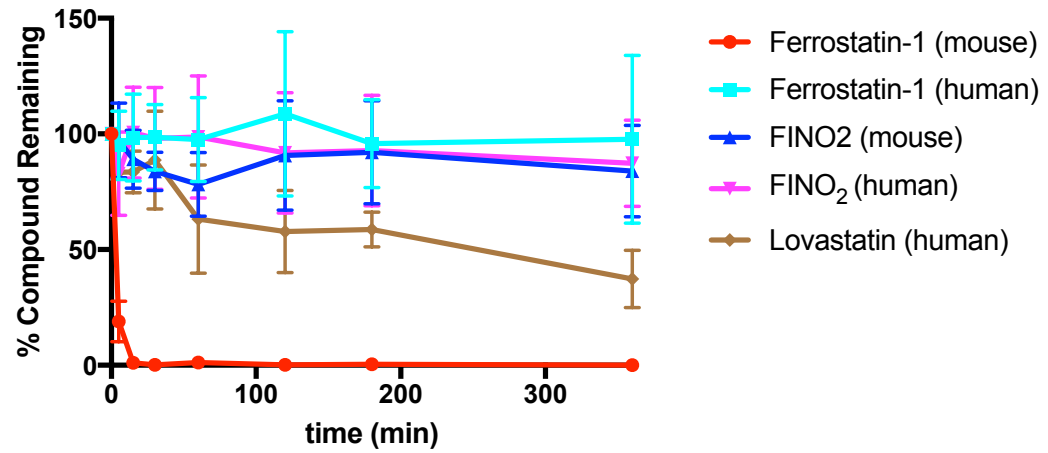

**Supplementary Figure 9.** Metabolic stability of FINO<sub>2</sub>. (A) Stability of FINO<sub>2</sub> in mouse and human liver microsomes. (B) Stability of FINO<sub>2</sub> in mouse and human plasma. Experiments were performed in biological triplicate. Data are plotted as the mean ± s.d..

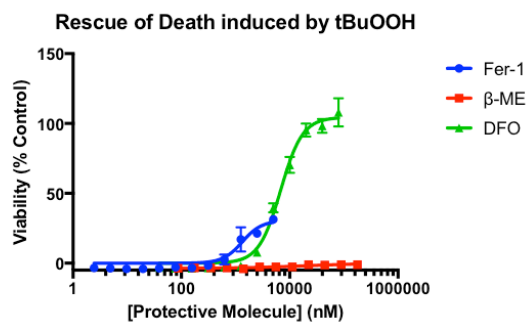

**Supplementary Figure 10.** Dose-dependent effect of ferroptosis-suppressing compounds on lethality initiated by tBuOOH (150  $\mu$ M). Viability was measured 24 h after compound addition using presto blue. Experiments were performed in biological triplicate. Data are plotted as the mean  $\pm$  s.d..

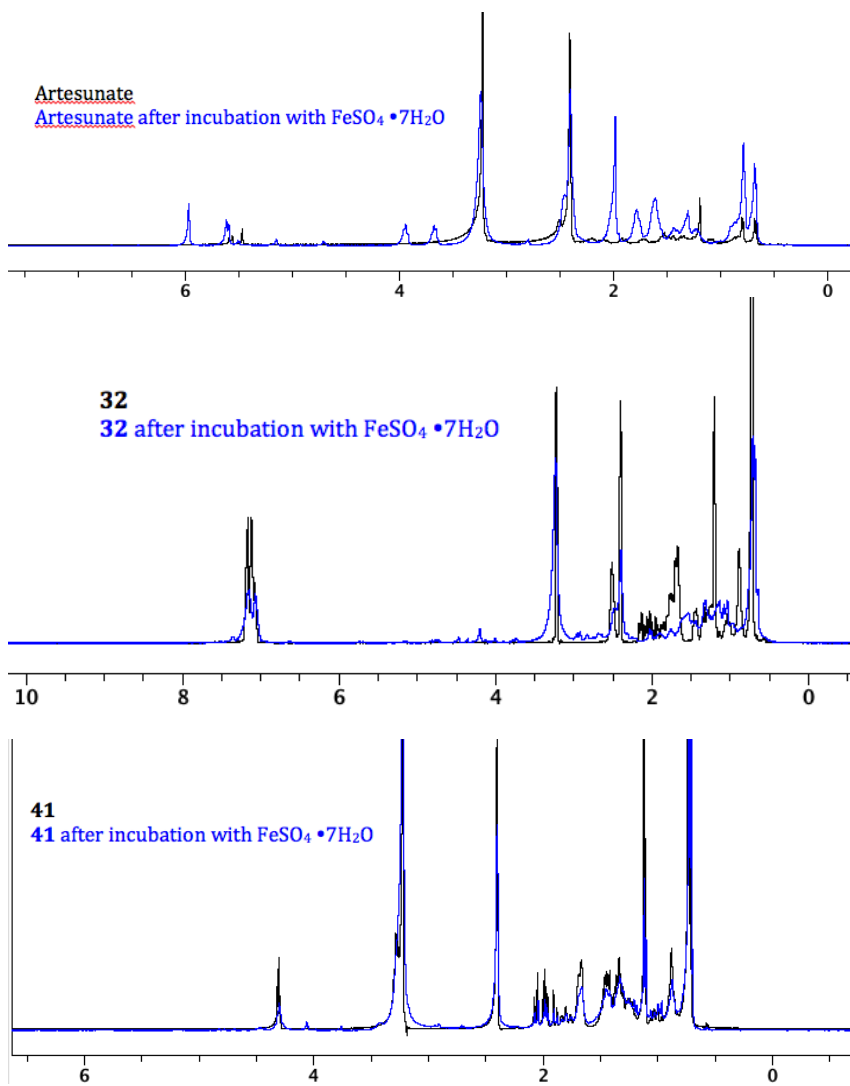

**Supplementary Figure 11.** Stability of Artesunate and FINO<sub>2</sub> analogues in the presence of FeSO<sub>4</sub>



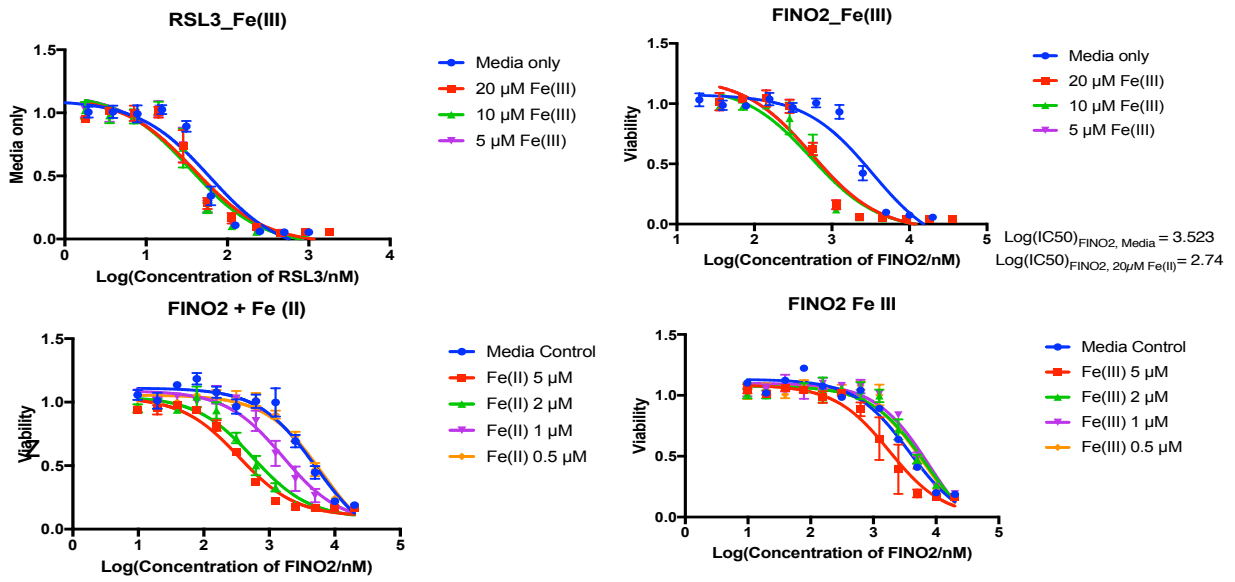

**Supplementary Figure 12.** Potency changes ferroptosis induction by  $\text{FINO}_2$  and RSL3 in the presence of iron salts. Experiments were done in biological triplicate. Data are plotted as the mean  $\pm$  s.d..

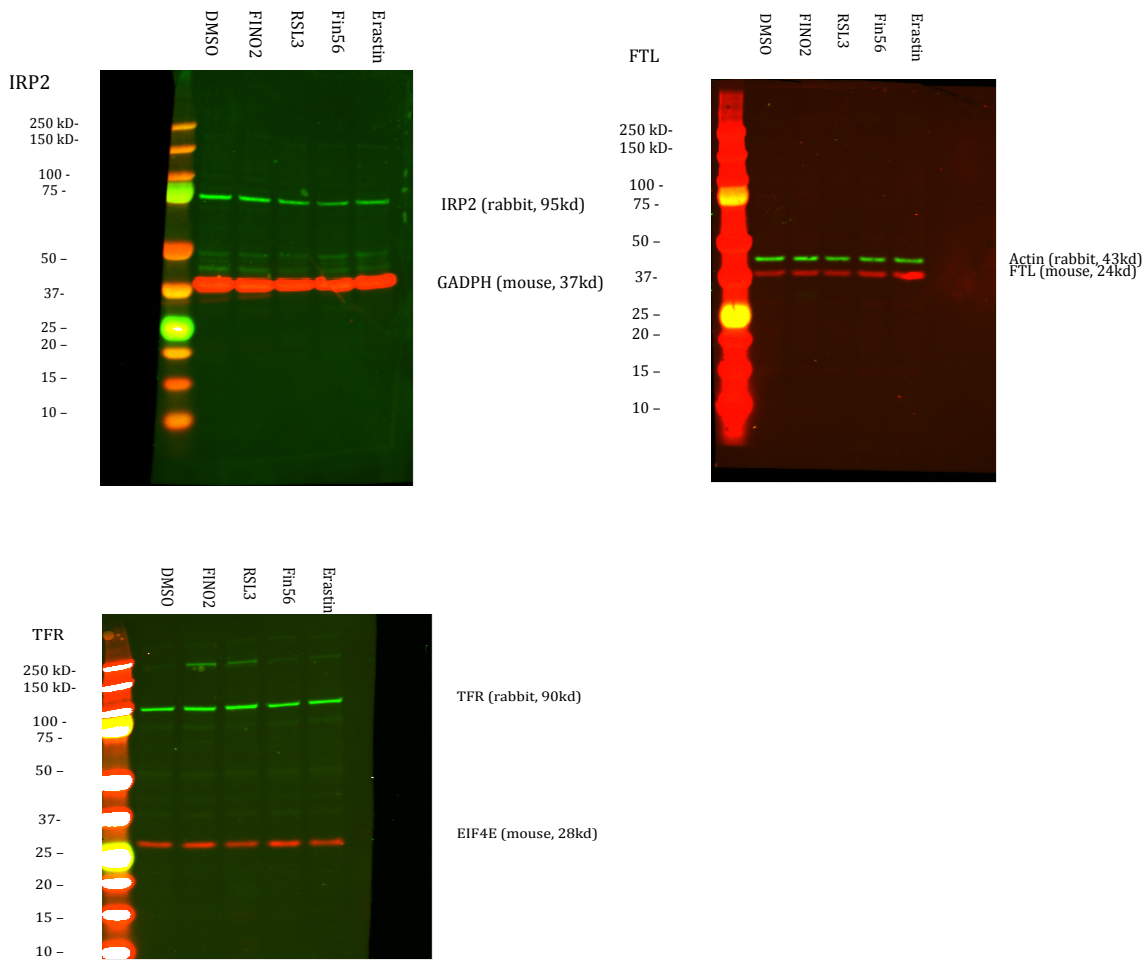

**Supplementary Figure 13.** Western blots of iron regulatory proteins in cells treated with vehicle (DMSO) or ferroptosis inducers. Experiments were performed in biological triplicate.

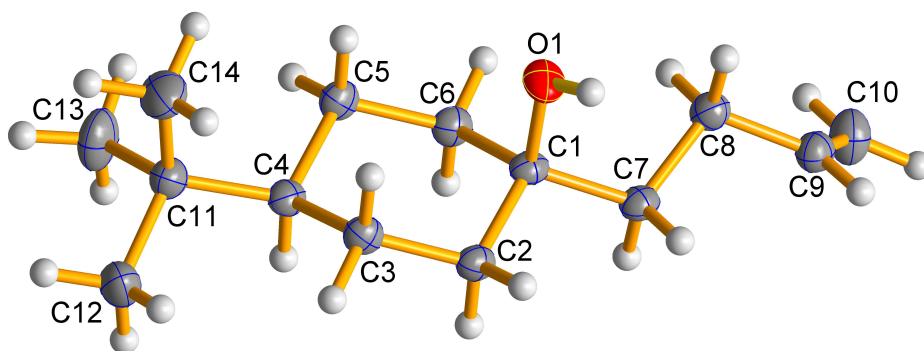

**Supplementary figure 14.** Crystal structure of **17a**

**Supplementary table 1** Retention times and m/z for LC-MS analysis of in vitro Pharmacokinetic studies.

| Compound          | Retention time | m/z   |
|-------------------|----------------|-------|
| Terfenadine       | 3.1 min        | 472.3 |
| Ferrostatin-1     | 3.3 min        | 263.1 |
| FINO <sub>2</sub> | 3.6 min        | 279.2 |
| Lovastatin        | 3.7 min        | 405.2 |
